# Supplementary material for: Reactive adsorption desulfurization of thiophene over NiMo/ZnO, a new adsorbent with high desulfurization performance and sulfur capacity at moderate temperature
Source: Royal Society of Chemistry journal article supplement (doi:10.1039/c9cy01070j), 2019-01-01
Supplement: c9cy01070j1.pdf [file c9cy01070j1.pdf]

---

**Supporting Information**

**Reactive adsorption desulfurization of thiophene over NiMo/ZnO, a new adsorbent with high desulfurization performance and sulfur capacity at moderate temperature**

Mingxing Tang<sup>a,b</sup>, Weixing Wang<sup>c</sup>, Ligong Zhou<sup>a</sup>, Ye Zhang<sup>a</sup>, Zhangfeng Qin<sup>a</sup>, Wenpeng Han<sup>a</sup>,  
Jianguo Wang<sup>a</sup>, Hui Ge<sup>a,\*</sup>, Xuekuan Li<sup>a,\*</sup>

<sup>a</sup> *State Key Laboratory of Coal Conversion, Institute of Coal Chemistry, Chinese Academy of Sciences, Taiyuan, Shanxi 030001, P. R. China*

<sup>b</sup> *University of Chinese Academy of Sciences, Beijing, 100049, P. R. China.*

<sup>c</sup> *Southwest petroleum University, School of Chemistry & Chemical Engineering, Chengdu, Sichuan, 650100, P. R. China*

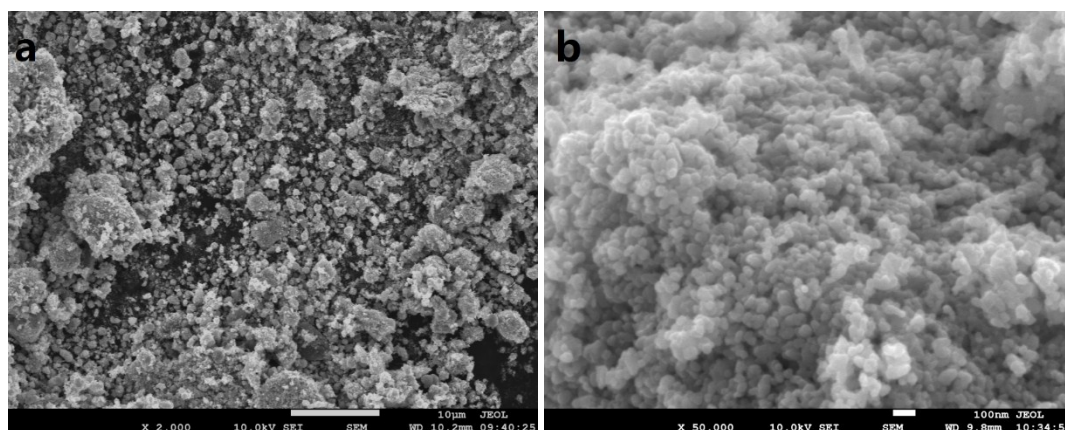

Fig. S1 The SEM photograph of ZnO support with magnification of  
a)2000 times, and b)50000 times

---

$\text{CuSO}_4$  aqueous solution can react with  $\text{H}_2\text{S}$  and form black  $\text{CuS}$  precipitation. It is an effective indicator to detect accumulated amount of trace  $\text{H}_2\text{S}$ . In this work, 0.1 mol/L  $\text{CuSO}_4$  aqueous solution was prepared as follow: 16.0 g  $\text{CuSO}_4$  dissolved with deionized water then 1 ml of sulfuric acid (98%) was added into the solution to prevent the hydrolysis of  $\text{CuSO}_4$ . Finally, the mixed solution was transferred to 1000 ml volumetric flask and filled with deionized water.

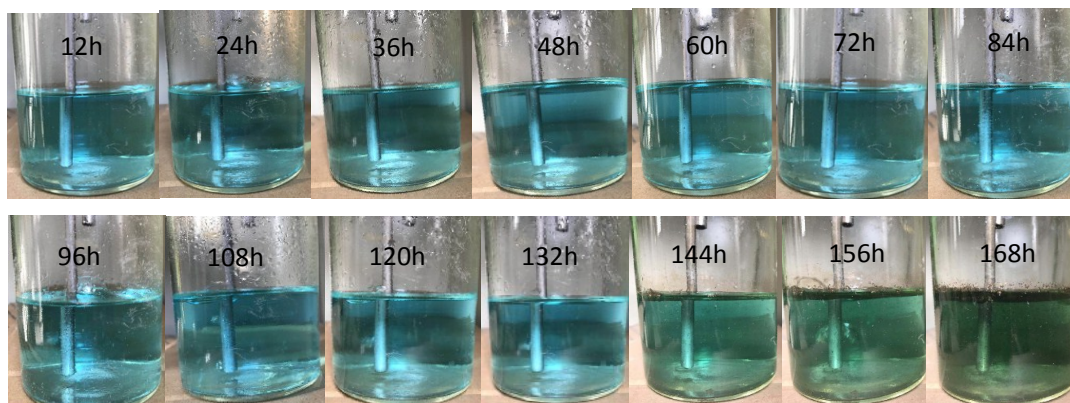

Fig. S2  $\text{H}_2\text{S}$  in tail gas detected by  $\text{CuSO}_4$  aqueous solution over 3Ni7Mo/ZnO-280.

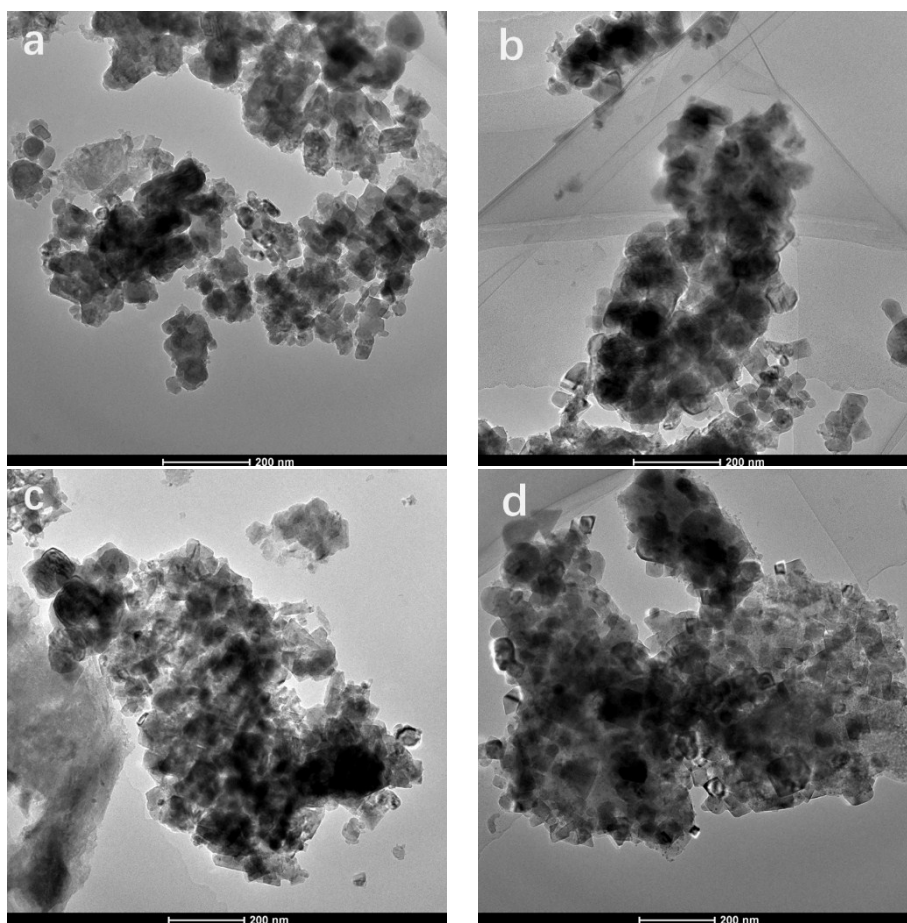

Fig. S3 Representative TEM images of used 3Ni7Mo/ZnO adsorbent (a) 3Ni7Mo/ZnO-280, (b) 3Ni7Mo/ZnO-340, (c) 3Ni7Mo/ZnO-400, (d) 3Ni7Mo/ZnO-500.
